# Supplementary material for: Kininogen supports inflammation and bacterial spreading during Streptococccus Pyogenes Sepsis
Source: PubMed Central journal article supplement — eBioMedicine. 2020 Jul 21;58:102908. doi: 10.1016/j.ebiom.2020.102908 (PMC7381504; doi:10.1016/j.ebiom.2020.102908), 2020-07-21
Supplement: mmc1.pdf [file mmc1.pdf]

**Supplemental Table 1.** Mass spectrometric quantification of plasma proteins from control-ASO treated mice compared to KNG1/2-ASO treated mice

| Protein name                                           | Unique peptides | Protein abundance (fmol on column) |       |       |                            |       |       | Comparative analysis    |           |
|--------------------------------------------------------|-----------------|------------------------------------|-------|-------|----------------------------|-------|-------|-------------------------|-----------|
|                                                        |                 | Control-ASO animals (n = 5)        |       |       | KNG1/2-ASO animals (n = 5) |       |       | Fold Change control/KNG | Anova (p) |
|                                                        |                 | Mean                               | SD    | CV    | Mean                       | SD    | CV    |                         |           |
| Actin cytoplasmic 1                                    | 8               | 1.73                               | 0.64  | 36.85 | 2.22                       | 0.41  | 18.65 | 0.78                    | 1.65E-01  |
| Adiponectin                                            | 3               | 1.94                               | 0.36  | 18.55 | 1.94                       | 0.30  | 15.58 | 1.00                    | 9.85E-01  |
| Afamin                                                 | 22              | 13.59                              | 1.07  | 7.87  | 15.17                      | 0.94  | 6.21  | 0.90                    | 4.12E-02  |
| Alpha-1-acid glycoprotein 1                            | 4               | 4.90                               | 2.04  | 41.66 | 6.29                       | 1.74  | 27.67 | 0.78                    | 2.85E-01  |
| Alpha-1-antitrypsin 1-1                                | 7               | 53.39                              | 7.69  | 14.41 | 45.92                      | 2.80  | 6.10  | 1.16                    | 7.72E-02  |
| Alpha-1-antitrypsin 1-2                                | 8               | 45.72                              | 4.79  | 10.47 | 41.40                      | 2.42  | 5.83  | 1.10                    | 1.19E-01  |
| Alpha-2-antiplasmin                                    | 17              | 9.95                               | 0.62  | 6.26  | 10.10                      | 0.40  | 3.94  | 0.99                    | 6.41E-01  |
| Alpha-2-HS-glycoprotein                                | 11              | 82.83                              | 17.94 | 21.66 | 81.88                      | 5.72  | 6.98  | 1.01                    | 9.64E-01  |
| Angiotensinogen                                        | 6               | 1.91                               | 0.46  | 24.28 | 1.62                       | 0.28  | 17.54 | 1.18                    | 2.79E-01  |
| Antithrombin-III                                       | 29              | 19.21                              | 5.22  | 27.17 | 21.64                      | 2.10  | 9.69  | 0.89                    | 3.49E-01  |
| Apolipoprotein A-I                                     | 36              | 152.45                             | 31.61 | 20.73 | 150.54                     | 18.89 | 12.55 | 1.01                    | 9.86E-01  |
| Apolipoprotein A-IV                                    | 28              | 31.34                              | 4.79  | 15.29 | 26.66                      | 2.47  | 9.27  | 1.18                    | 8.19E-02  |
| Apolipoprotein C-I                                     | 2               | 6.82                               | 0.90  | 13.17 | 6.33                       | 0.65  | 10.30 | 1.08                    | 3.79E-01  |
| Apolipoprotein C-III                                   | 4               | 18.63                              | 7.33  | 39.35 | 13.84                      | 3.25  | 23.49 | 1.35                    | 2.21E-01  |
| Apolipoprotein D                                       | 5               | 1.42                               | 0.14  | 9.94  | 1.68                       | 0.16  | 9.80  | 0.85                    | 2.59E-02  |
| Apolipoprotein E                                       | 17              | 7.05                               | 1.62  | 22.97 | 6.60                       | 0.74  | 11.25 | 1.07                    | 6.69E-01  |
| Apolipoprotein M                                       | 4               | 0.95                               | 0.14  | 15.09 | 0.83                       | 0.09  | 11.04 | 1.15                    | 1.43E-01  |
| Band 3 anion transport protein                         | 2               | 0.50                               | 0.45  | 91.16 | 0.51                       | 0.23  | 45.15 | 0.97                    | 8.76E-01  |
| Beta-2-glycoprotein 1                                  | 23              | 15.65                              | 2.02  | 12.90 | 15.66                      | 1.27  | 8.14  | 1.00                    | 9.49E-01  |
| Beta-2-microglobulin                                   | 3               | 3.04                               | 0.47  | 15.54 | 3.64                       | 0.34  | 9.45  | 0.84                    | 5.38E-02  |
| C4b-binding protein                                    | 5               | 2.22                               | 0.30  | 13.71 | 3.10                       | 0.39  | 12.73 | 0.72                    | 4.48E-03  |
| Carbonic anhydrase 1                                   | 5               | 1.05                               | 0.47  | 45.26 | 0.94                       | 0.28  | 29.87 | 1.11                    | 7.83E-01  |
| Carbonic anhydrase 2                                   | 6               | 4.85                               | 1.70  | 35.11 | 4.48                       | 1.40  | 31.30 | 1.08                    | 8.05E-01  |
| Carboxylesterase 1C                                    | 15              | 70.80                              | 5.71  | 8.06  | 69.26                      | 7.90  | 11.40 | 1.02                    | 7.03E-01  |
| Carboxypeptidase N catalytic chain                     | 8               | 2.05                               | 0.14  | 6.84  | 2.21                       | 0.23  | 10.32 | 0.93                    | 2.27E-01  |
| Carboxypeptidase N subunit 2                           | 13              | 5.11                               | 0.81  | 15.80 | 5.25                       | 0.38  | 7.18  | 0.97                    | 6.68E-01  |
| CD5 antigen-like                                       | 13              | 1.31                               | 0.20  | 15.33 | 1.57                       | 0.22  | 14.04 | 0.84                    | 8.97E-02  |
| Ceruloplasmin                                          | 43              | 12.17                              | 2.13  | 17.51 | 12.27                      | 1.86  | 15.12 | 0.99                    | 9.16E-01  |
| Clusterin                                              | 16              | 8.56                               | 1.76  | 20.60 | 8.91                       | 0.79  | 8.90  | 0.96                    | 6.26E-01  |
| Coagulation factor X                                   | 9               | 2.04                               | 0.38  | 18.41 | 2.02                       | 0.04  | 2.12  | 1.01                    | 9.88E-01  |
| Coagulation factor XII                                 | 3               | 0.63                               | 0.22  | 35.09 | 0.66                       | 0.07  | 10.32 | 0.96                    | 7.38E-01  |
| Coagulation factor XIII B chain                        | 2               | 0.37                               | 0.18  | 48.11 | 0.30                       | 0.08  | 27.26 | 1.24                    | 4.45E-01  |
| Complement C1q subcomponent subunit B                  | 2               | 1.01                               | 0.20  | 19.58 | 1.16                       | 0.17  | 14.30 | 0.87                    | 2.28E-01  |
| Complement C3                                          | 106             | 33.88                              | 3.36  | 9.92  | 26.73                      | 1.32  | 4.95  | 1.27                    | 1.44E-03  |
| Complement C4-B                                        | 33              | 18.28                              | 1.09  | 5.97  | 18.82                      | 0.36  | 1.93  | 0.97                    | 3.11E-01  |
| Complement C5                                          | 27              | 1.63                               | 0.23  | 13.88 | 1.59                       | 0.16  | 10.09 | 1.03                    | 7.39E-01  |
| Complement component C8 alpha chain                    | 4               | 0.36                               | 0.14  | 38.27 | 0.40                       | 0.09  | 23.31 | 0.91                    | 6.49E-01  |
| Complement component C8 gamma chain                    | 3               | 0.65                               | 0.18  | 27.99 | 0.70                       | 0.14  | 19.64 | 0.92                    | 5.62E-01  |
| Complement factor B                                    | 24              | 8.21                               | 0.93  | 11.28 | 7.28                       | 0.38  | 5.26  | 1.13                    | 6.81E-02  |
| Complement factor D                                    | 5               | 5.62                               | 2.87  | 50.96 | 5.20                       | 1.54  | 29.54 | 1.08                    | 8.92E-01  |
| Complement factor H                                    | 47              | 13.66                              | 5.98  | 43.76 | 10.59                      | 1.76  | 16.59 | 1.29                    | 4.05E-01  |
| Complement factor I                                    | 17              | 6.34                               | 0.95  | 14.99 | 5.95                       | 0.39  | 6.61  | 1.06                    | 4.73E-01  |
| Corticosteroid-binding globulin                        | 10              | 13.71                              | 2.10  | 15.35 | 15.77                      | 3.56  | 22.58 | 0.87                    | 3.51E-01  |
| C-reactive protein                                     | 2               | 0.50                               | 0.07  | 14.38 | 0.51                       | 0.02  | 4.46  | 0.98                    | 7.22E-01  |
| Extracellular matrix protein 1                         | 3               | 0.58                               | 0.06  | 9.77  | 0.55                       | 0.07  | 12.77 | 1.06                    | 4.44E-01  |
| Fetuin-B                                               | 8               | 5.95                               | 0.92  | 15.37 | 6.26                       | 0.63  | 10.11 | 0.95                    | 5.23E-01  |
| Fibrinogen alpha chain                                 | 28              | 47.22                              | 5.62  | 11.91 | 42.58                      | 1.93  | 4.54  | 1.11                    | 1.33E-01  |
| Fibrinogen beta chain                                  | 43              | 48.43                              | 7.26  | 14.98 | 47.27                      | 4.18  | 8.84  | 1.02                    | 8.26E-01  |
| Fibrinogen gamma chain                                 | 32              | 66.33                              | 11.84 | 17.85 | 65.37                      | 7.54  | 11.54 | 1.01                    | 9.42E-01  |
| Flavin reductase (NADPH)                               | 6               | 0.94                               | 0.37  | 39.02 | 0.84                       | 0.10  | 11.79 | 1.11                    | 6.63E-01  |
| Gelsolin                                               | 29              | 13.30                              | 1.91  | 14.35 | 12.99                      | 1.47  | 11.33 | 1.02                    | 7.97E-01  |
| Glutathione peroxidase 3                               | 8               | 6.28                               | 1.13  | 17.92 | 6.22                       | 0.88  | 14.16 | 1.01                    | 9.68E-01  |
| H-2 class I histocompatibility antigen_Q10 alpha chain | 12              | 3.98                               | 0.43  | 10.76 | 4.85                       | 0.50  | 10.29 | 0.82                    | 1.85E-02  |
| Hemoglobin subunit alpha                               | 10              | 179.44                             | 51.57 | 28.74 | 183.94                     | 34.40 | 18.70 | 0.98                    | 7.72E-01  |
| Hemoglobin subunit beta-1                              | 9               | 279.39                             | 94.43 | 33.80 | 267.99                     | 64.70 | 24.14 | 1.04                    | 9.39E-01  |

|                                                                        |    |        |       |       |        |       |       |       |          |
|------------------------------------------------------------------------|----|--------|-------|-------|--------|-------|-------|-------|----------|
| Hemoglobin subunit beta-2                                              | 9  | 123.31 | 36.35 | 29.48 | 119.80 | 27.03 | 22.56 | 1.03  | 9.46E-01 |
| Hemopexin                                                              | 33 | 41.52  | 5.16  | 12.41 | 46.09  | 5.53  | 12.00 | 0.90  | 2.01E-01 |
| Heparin cofactor 2                                                     | 8  | 71.35  | 8.56  | 12.00 | 66.66  | 10.28 | 15.42 | 1.07  | 4.32E-01 |
| Hepatocyte growth factor activator                                     | 4  | 1.39   | 0.13  | 9.33  | 1.30   | 0.23  | 18.02 | 1.07  | 4.44E-01 |
| Histidine-rich glycoprotein                                            | 14 | 4.57   | 0.39  | 8.56  | 4.55   | 0.51  | 11.30 | 1.00  | 9.25E-01 |
| Ig alpha chain C region                                                | 6  | 1.38   | 0.26  | 18.57 | 1.69   | 0.33  | 19.32 | 0.82  | 1.30E-01 |
| Ig gamma-1 chain C region secreted form                                | 8  | 24.06  | 5.41  | 22.50 | 25.88  | 3.09  | 11.94 | 0.93  | 4.83E-01 |
| Ig gamma-2A chain C region A allele                                    | 7  | 2.66   | 1.23  | 46.05 | 2.84   | 1.23  | 43.38 | 0.94  | 8.19E-01 |
| Ig gamma-2B chain C region                                             | 9  | 6.66   | 1.47  | 22.05 | 7.52   | 1.71  | 22.68 | 0.89  | 4.04E-01 |
| Ig gamma-3 chain C region                                              | 10 | 8.46   | 1.42  | 16.79 | 7.97   | 3.02  | 37.84 | 1.06  | 5.92E-01 |
| Ig heavy chain V region AC38 205.12                                    | 3  | 2.31   | 0.41  | 17.79 | 2.33   | 0.30  | 13.00 | 0.99  | 8.96E-01 |
| Ig heavy chain V-III region A4                                         | 3  | 0.74   | 0.14  | 19.03 | 0.92   | 0.20  | 22.11 | 0.80  | 1.38E-01 |
| Ig kappa chain V19-17                                                  | 2  | 0.96   | 0.11  | 11.61 | 1.00   | 0.23  | 23.20 | 0.97  | 8.14E-01 |
| Ig kappa chain V-II region 26-10                                       | 2  | 0.57   | 0.13  | 23.50 | 0.62   | 0.17  | 27.73 | 0.91  | 5.92E-01 |
| Ig kappa chain V-V region K2 (Fragment)                                | 2  | 0.77   | 0.21  | 27.42 | 0.83   | 0.11  | 13.47 | 0.92  | 5.15E-01 |
| Ig kappa chain V-VI region XRPC 44                                     | 4  | 1.28   | 0.40  | 31.08 | 0.88   | 0.16  | 17.73 | 1.46  | 7.17E-02 |
| Ig lambda-1 chain C region                                             | 2  | 1.05   | 0.30  | 29.04 | 1.21   | 0.29  | 24.34 | 0.86  | 4.11E-01 |
| Ig lambda-1 chain V region                                             | 2  | 1.72   | 0.84  | 48.75 | 1.68   | 0.64  | 37.95 | 1.02  | 9.85E-01 |
| Immunoglobulin heavy constant mu                                       | 21 | 31.33  | 4.61  | 14.71 | 30.35  | 4.18  | 13.77 | 1.03  | 7.39E-01 |
| Immunoglobulin J chain                                                 | 3  | 1.44   | 0.27  | 19.00 | 1.67   | 0.23  | 14.07 | 0.86  | 1.83E-01 |
| Immunoglobulin kappa constant                                          | 4  | 5.37   | 0.63  | 11.75 | 5.46   | 1.97  | 36.14 | 0.98  | 8.79E-01 |
| Inhibitor of carbonic anhydrase                                        | 23 | 6.65   | 1.34  | 20.22 | 6.44   | 0.95  | 14.75 | 1.03  | 8.52E-01 |
| Insulin-like growth factor-binding protein complex acid labile subunit | 5  | 1.00   | 0.49  | 49.22 | 0.75   | 0.27  | 35.53 | 1.33  | 3.70E-01 |
| Inter alpha-trypsin inhibitor heavy chain 4                            | 25 | 5.93   | 0.56  | 9.52  | 5.88   | 0.47  | 7.96  | 1.01  | 8.99E-01 |
| Inter-alpha-trypsin inhibitor heavy chain H1                           | 16 | 3.70   | 0.70  | 18.82 | 3.60   | 0.20  | 5.59  | 1.03  | 8.74E-01 |
| Inter-alpha-trypsin inhibitor heavy chain H2                           | 19 | 10.25  | 2.92  | 28.47 | 8.33   | 1.15  | 13.85 | 1.23  | 2.13E-01 |
| Inter-alpha-trypsin inhibitor heavy chain H3                           | 12 | 2.46   | 0.51  | 20.88 | 2.83   | 0.18  | 6.33  | 0.87  | 1.65E-01 |
| Interleukin-1 receptor accessory protein                               | 8  | 3.89   | 1.84  | 47.44 | 3.73   | 0.44  | 11.66 | 1.04  | 8.54E-01 |
| Kininogen-1                                                            | 21 | 41.06  | 6.10  | 14.86 | 3.16   | 1.02  | 32.09 | 12.97 | 2.54E-07 |
| Leukemia inhibitory factor receptor                                    | 8  | 1.61   | 0.51  | 31.36 | 1.36   | 0.17  | 12.25 | 1.19  | 3.73E-01 |
| Lumican                                                                | 11 | 1.97   | 0.60  | 30.21 | 2.01   | 0.45  | 22.16 | 0.98  | 8.50E-01 |
| Mannan-binding lectin serine protease 2                                | 2  | 0.31   | 0.03  | 9.48  | 0.34   | 0.04  | 11.27 | 0.91  | 1.94E-01 |
| Mannose-binding protein A                                              | 3  | 0.88   | 0.14  | 15.87 | 0.83   | 0.07  | 8.23  | 1.05  | 5.66E-01 |
| Mannose-binding protein C                                              | 6  | 2.89   | 0.16  | 5.40  | 3.35   | 0.23  | 6.92  | 0.86  | 5.51E-03 |
| Murinoglobulin-1                                                       | 40 | 49.89  | 16.33 | 32.74 | 51.55  | 7.46  | 14.47 | 0.97  | 6.82E-01 |
| N-acetylmuramoyl-L-alanine amidase                                     | 3  | 0.73   | 0.11  | 15.06 | 0.75   | 0.06  | 7.67  | 0.97  | 6.74E-01 |
| Odorant-binding protein 1b                                             | 2  | 0.22   | 0.18  | 84.96 | 0.22   | 0.20  | 91.68 | 1.00  | 9.98E-01 |
| Peroxiredoxin-2                                                        | 9  | 3.61   | 1.59  | 44.20 | 3.50   | 1.19  | 33.85 | 1.03  | 9.75E-01 |
| Phosphatidylcholine-sterol acyltransferase                             | 5  | 1.29   | 0.16  | 12.13 | 1.38   | 0.08  | 5.92  | 0.94  | 2.86E-01 |
| Phosphatidylinositol-glycan-specific phospholipase D                   | 10 | 1.26   | 0.14  | 10.85 | 1.14   | 0.19  | 16.93 | 1.11  | 2.73E-01 |
| Pigment epithelium-derived factor                                      | 2  | 0.55   | 0.17  | 30.47 | 0.53   | 0.07  | 12.41 | 1.03  | 8.61E-01 |
| Plasma kallikrein                                                      | 18 | 2.89   | 0.25  | 8.75  | 0.98   | 0.06  | 5.65  | 2.95  | 1.59E-08 |
| Plasma protease C1 inhibitor                                           | 14 | 5.69   | 0.86  | 15.12 | 5.63   | 0.98  | 17.33 | 1.01  | 8.92E-01 |
| Plasminogen                                                            | 51 | 17.31  | 2.96  | 17.10 | 18.66  | 1.55  | 8.30  | 0.93  | 3.73E-01 |
| Pregnancy zone protein                                                 | 84 | 145.63 | 23.71 | 16.28 | 143.70 | 7.16  | 4.98  | 1.01  | 9.53E-01 |
| Properdin                                                              | 3  | 1.57   | 0.16  | 10.20 | 1.66   | 0.18  | 10.57 | 0.94  | 3.91E-01 |
| Protein AMBP                                                           | 7  | 7.69   | 0.89  | 11.52 | 7.51   | 0.52  | 6.90  | 1.02  | 7.54E-01 |

|                                        |    |         |        |       |         |        |       |      |          |
|----------------------------------------|----|---------|--------|-------|---------|--------|-------|------|----------|
| Protein Z-dependent protease inhibitor | 3  | 0.67    | 0.09   | 13.07 | 0.73    | 0.06   | 8.65  | 0.92 | 2.42E-01 |
| Prothrombin                            | 33 | 10.29   | 1.97   | 19.17 | 10.12   | 1.08   | 10.67 | 1.02 | 9.56E-01 |
| Retinol-binding protein 4              | 8  | 3.00    | 0.75   | 25.03 | 3.30    | 0.78   | 23.76 | 0.91 | 5.71E-01 |
| Secreted phosphoprotein 24             | 2  | 0.52    | 0.02   | 3.67  | 0.60    | 0.07   | 12.08 | 0.86 | 3.60E-02 |
| Selenoprotein P                        | 4  | 1.26    | 0.25   | 19.86 | 1.15    | 0.28   | 24.85 | 1.10 | 5.42E-01 |
| Serine protease inhibitor A3K          | 16 | 135.52  | 42.58  | 31.42 | 111.10  | 32.00  | 28.80 | 1.22 | 3.37E-01 |
| Serine protease inhibitor A3N          | 12 | 2.06    | 0.26   | 12.46 | 2.23    | 0.19   | 8.36  | 0.92 | 2.62E-01 |
| Serotransferrin                        | 69 | 240.49  | 22.51  | 9.36  | 285.82  | 14.29  | 5.00  | 0.84 | 6.36E-03 |
| Serum albumin                          | 74 | 1218.42 | 159.30 | 13.07 | 1207.37 | 124.03 | 10.27 | 1.01 | 9.30E-01 |
| Serum amyloid A-4 protein              | 7  | 1.43    | 0.41   | 28.86 | 1.62    | 0.20   | 12.67 | 0.88 | 3.53E-01 |
| Serum amyloid P-component              | 7  | 7.36    | 0.89   | 12.06 | 8.04    | 1.27   | 15.83 | 0.91 | 3.95E-01 |
| Serum paraoxonase/arylesterase 1       | 9  | 7.46    | 1.70   | 22.78 | 8.09    | 1.42   | 17.50 | 0.92 | 5.32E-01 |
| Sulfhydryl oxidase 1                   | 14 | 1.81    | 0.27   | 15.15 | 1.74    | 0.32   | 18.23 | 1.04 | 7.03E-01 |
| Transthyretin                          | 11 | 13.88   | 2.76   | 19.89 | 16.52   | 2.54   | 15.40 | 0.84 | 1.33E-01 |
| Vitamin D-binding protein              | 36 | 28.60   | 11.01  | 38.49 | 26.03   | 5.41   | 20.78 | 1.10 | 8.04E-01 |
| Vitronectin                            | 8  | 6.25    | 0.86   | 13.76 | 6.30    | 0.48   | 7.68  | 0.99 | 8.51E-01 |
| Zinc-alpha-2-glycoprotein              | 11 | 2.41    | 0.21   | 8.60  | 2.31    | 0.32   | 13.73 | 1.04 | 5.33E-01 |

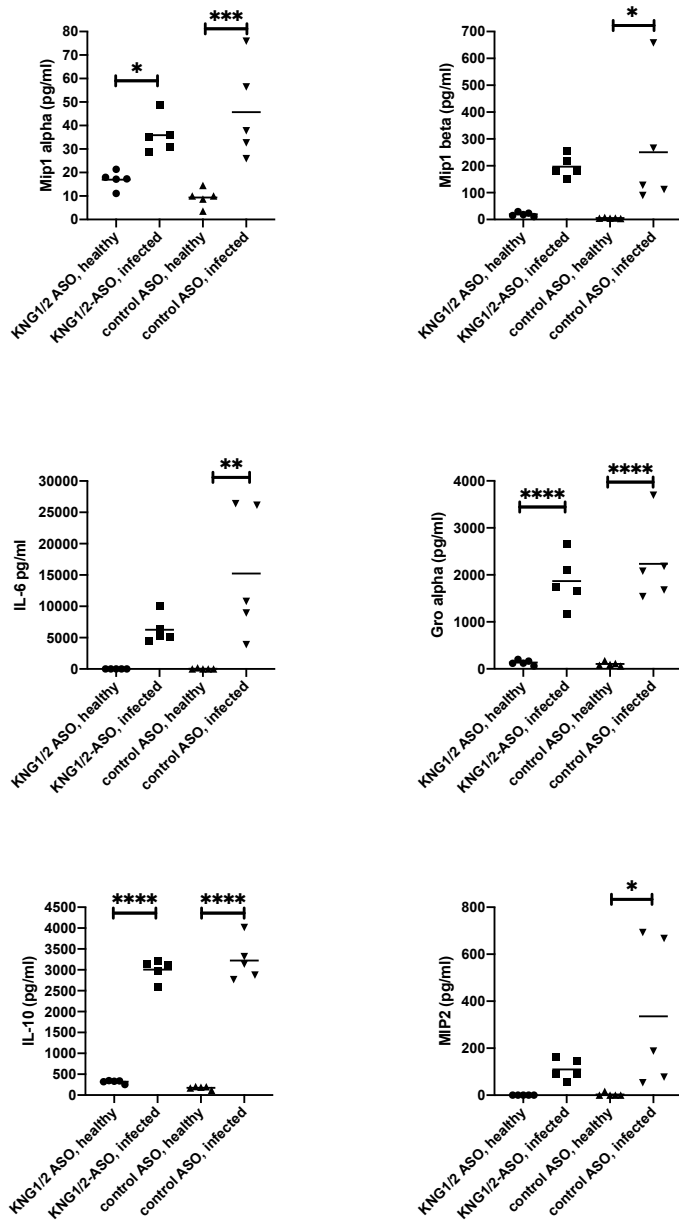

**suppl. Fig. 1. Proinflammatory response of control- and kininogen-depleted mice infected with *S. pyogenes*.** Mice (n=5/group) were injected sc. with  $2 \times 10^7$  CFU/mouse *S. pyogenes* AP1. 24 hours after infection animals were collected and EDTA plasma was analyzed for Mip1 alpha, Mip1 beta, IL6, Gro alpha, IL10, and MIP2, using a Multi-Plex immunoassay. One-way ANOVA \* $p \leq 0.05$ , \*\* $p \leq 0.01$ , \*\*\* $p \leq 0.0002$ , \*\*\*\* $p \leq 0.0001$ .

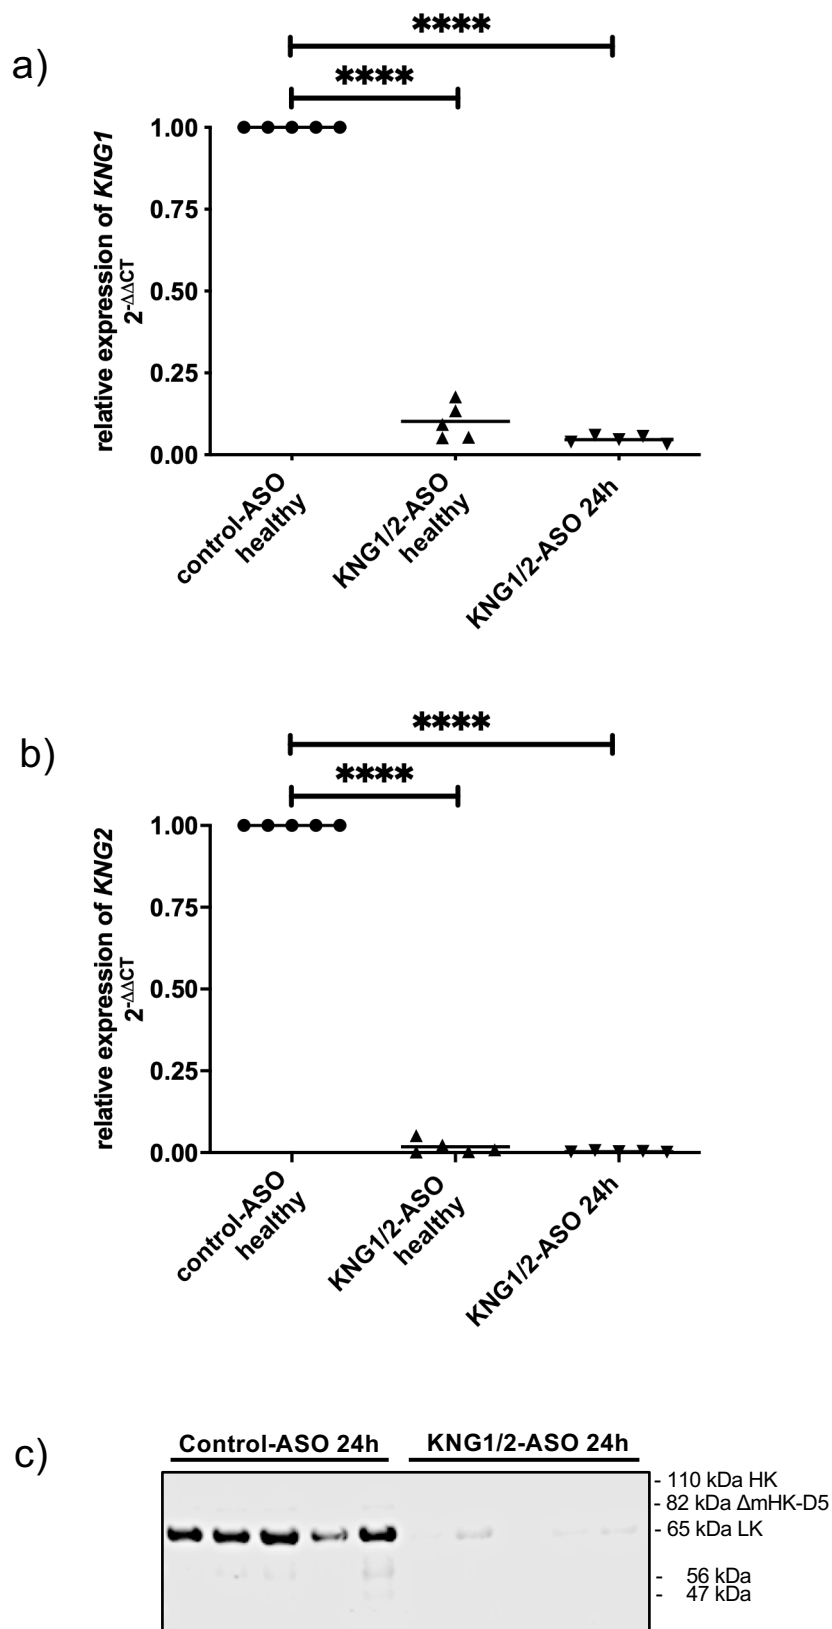

**Suppl. Figure 2: Analysis of kininogen gene expression and protein levels after KNG1/2-ASO treatment and infection.** Groups of mice were treated with KNG1/2-ASO or control-ASO through intraperitoneal injections, with a dose of 800  $\mu\text{g}/\text{mouse}$ , twice per week for 3 weeks (total 7 injections, each with 800  $\mu\text{g}$  ASO/mouse). Thereafter mice were injected sc. with  $1.5 - 2 \times 10^7$  CFU/mouse *S. pyogenes* AP1. a, b) 24 hours after infection liver tissue was collected for total RNA isolation and gene expression analysis of *KNG1/2*. One sample t-test, \*\*\*\*  $p \leq 0.0001$  c) Western Blot analysis of mouse plasma, 24h after infection, with an antibody against kininogen.
